# Supplementary material
Source: PubMed Central journal article supplement (PMC3522126)
Supplement: Supp_Data.pdf [file Supp_Data.pdf]

## Supplementary Data

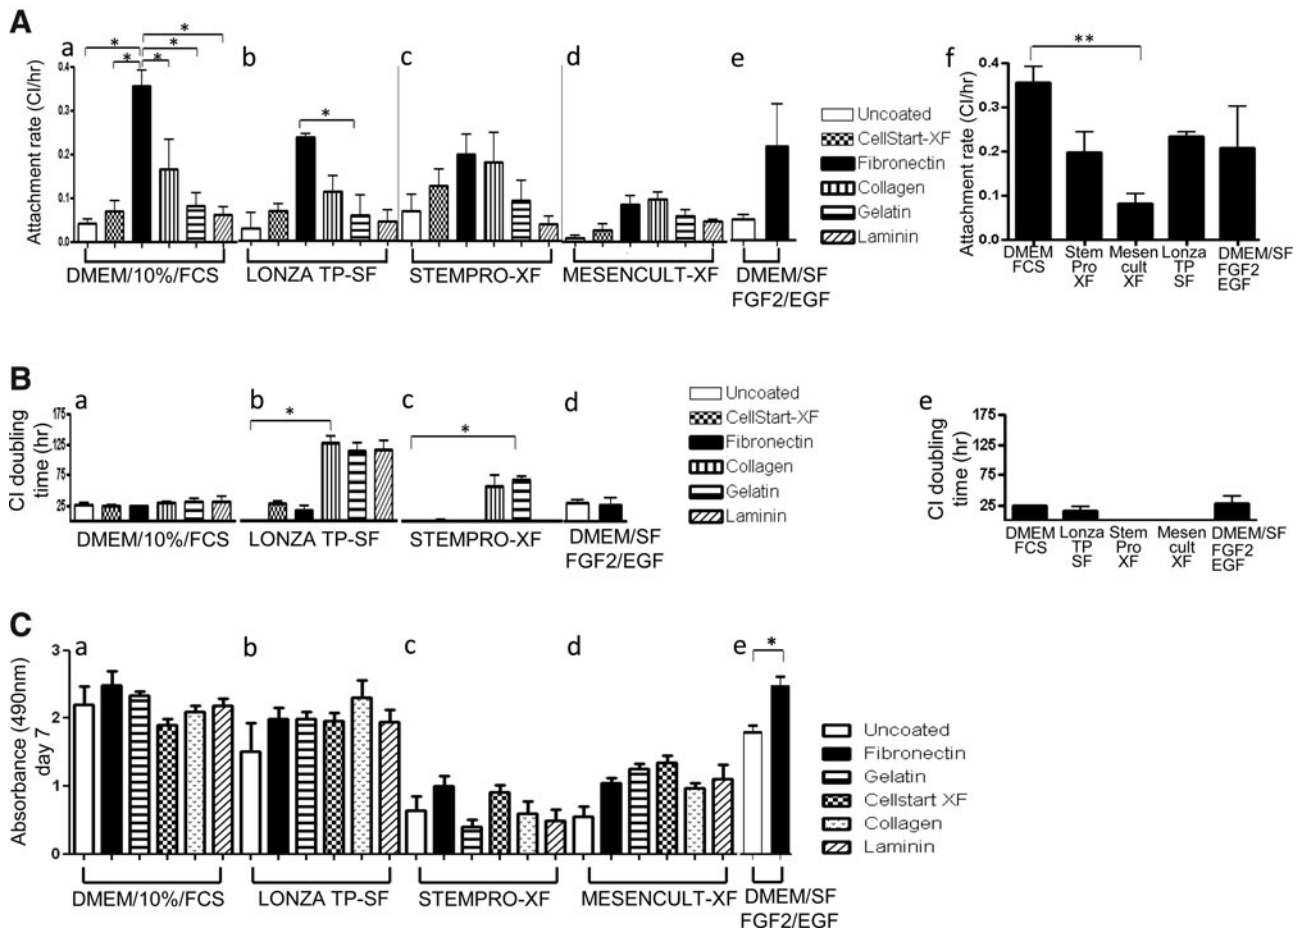

**SUPPLEMENTARY FIG. S1.** Attachment and growth rates of unsorted human endometrial stromal cells to various matrices when cultured in serum-containing, and serum- and xeno-free media measured using (A, B) Xcelligence and (C) MTS. (A) Rate of stromal cell attachment (CI/h) cultured on different matrices in (a) DMEM/10%FCS, (b) Lonza Therapeak-SF®, (c) StemPro-XF®, (d) Mesencult-XF®, (e) in house DMEM/SF/FGF2/EGF media. (f) Stromal cell attachment replotted for fibronectin matrix in the five different media. (B) Stromal cell growth rate measured as CI doubling times were calculated for the period between the second and third media change as shown in Figure 3. Lowest positive value is the most rapid doubling time or cell growth, zero indicates no growth or loss of viability. CI doubling times for various matrices when cultured in (a) DMEM/10%FCS, (b) Lonza Therapeak-SF, (c) StemPro-XF, (d) in house DMEM/SF/FGF2/EGF media. Data for Mesencult-XF not shown as all were 0 for the various matrices. (e) Stromal cell attachment replotted for fibronectin matrix in the five different media. (C) Stromal cell growth rate measured by MTS viability assay in five different media and plotted for day 7. Stromal cells cultured in (a) DMEM/10%FCS, (b) Lonza TP SF, (c) StemPro-XF, (d) Mesencult-XF on five different matrices, and (e) in house DMEM/SF/FGF2/EGF on uncoated and fibronectin surfaces. Data are mean ± SEM ( $n=3$  samples from three different patients). \* $p < 0.05$ , \*\* $p < 0.01$ . CI, cell index; SF, serum-free, XF, xeno-free; FGF2, fibroblast growth factor 2; EGF, epidermal growth factor.
